# Supplementary material for: Antagonistic Activity against Ascosphaera apis and Functional Properties of Lactobacillus kunkeei Strains
Source: MDPI journal article supplement (doi:10.3390/antibiotics9050262), 2020-05-18
Supplement: s1 [file s1]

| Bee bread                   |                        | Honey stomach               |                        | Mid gut                     |                        |                             |                        |
|-----------------------------|------------------------|-----------------------------|------------------------|-----------------------------|------------------------|-----------------------------|------------------------|
| <i>L.kunkeei</i><br>strains | Antifungal<br>activity | <i>L.kunkeei</i><br>strains | Antifungal<br>activity | <i>L.kunkeei</i><br>strains | Antifungal<br>activity | <i>L.kunkeei</i><br>strains | Antifungal<br>activity |
| K1                          | low intensity          | K4                          | medium intensity       | K2                          | medium intensity       | K53                         | medium intensity       |
| K3                          | medium intensity       | K9                          | high intensity         | K5                          | medium intensity       | K54                         | medium intensity       |
| K7                          | 100 % inhibition       | K18                         | 100 % inhibition       | K6                          | high intensity         | K55                         | 100 % inhibition       |
| K8                          | medium intensity       | K20                         | medium intensity       | K13                         | medium intensity       | K57                         | medium intensity       |
| K10                         | medium intensity       | K21                         | medium intensity       | K14                         | low intensity          | K59                         | medium intensity       |
| K11                         | high intensity         | K28                         | low intensity          | K15                         | medium intensity       | K63                         | medium intensity       |
| K12                         | medium intensity       | K36                         | medium intensity       | K16                         | high intensity         | K64                         | 100 % inhibition       |
| K23                         | low intensity          | K50                         | high intensity         | K17                         | high intensity         | K65                         | medium intensity       |
| K24                         | medium intensity       | K51                         | medium intensity       | K19                         | medium intensity       | K66                         | medium intensity       |
| K34                         | 100 % inhibition       | K56                         | medium intensity       | K22                         | low intensity          | K69                         | medium intensity       |
|                             |                        | K58                         | medium intensity       | K25                         | medium intensity       | K70                         | medium intensity       |
|                             |                        | K60                         | medium intensity       | K26                         | high intensity         | K71                         | low intensity          |
|                             |                        | K62                         | medium intensity       | K29                         | high intensity         | K72                         | medium intensity       |
|                             |                        | K68                         | medium intensity       | K30                         | high intensity         | K73                         | medium intensity       |
|                             |                        | K74                         | medium intensity       | K32                         | high intensity         | K75                         | medium intensity       |
|                             |                        | K82                         | medium intensity       | K33                         | medium intensity       | K76                         | medium intensity       |
|                             |                        | K147                        | medium intensity       | K36                         | medium intensity       | K77                         | high intensity         |
|                             |                        |                             |                        | K38                         | medium intensity       | K78                         | low intensity          |
|                             |                        |                             |                        | K39                         | medium intensity       | K79                         | medium intensity       |
|                             |                        |                             |                        | K40                         | 100 % inhibition       | K80                         | medium intensity       |
|                             |                        |                             |                        | K41                         | 100 % inhibition       | K81                         | medium intensity       |
|                             |                        |                             |                        | K42                         | medium intensity       | K83                         | medium intensity       |
|                             |                        |                             |                        | K43                         | high intensity         | K84                         | low intensity          |
|                             |                        |                             |                        | K44                         | high intensity         | K87                         | medium intensity       |
|                             |                        |                             |                        | K45                         | 100 % inhibition       | K89                         | medium intensity       |
|                             |                        |                             |                        | K46                         | medium intensity       | K91                         | medium intensity       |
|                             |                        |                             |                        | K48                         | medium intensity       | K94                         | high intensity         |
|                             |                        |                             |                        | K49                         | medium intensity       | K103                        | medium intensity       |
|                             |                        |                             |                        | K52                         | medium intensity       | K112                        | 100 % inhibition       |
