# Supplementary material for: Antagonistic Activity against Ascosphaera apis and Functional Properties of Lactobacillus kunkeei Strains
Source: MDPI journal article supplement (doi:10.3390/antibiotics9050262), 2020-05-18
Supplement: s1 [file s1]

| Biofilm formation (OD <sub>580</sub> ) |                           |                           |                           |                           |                           |                           |                           |                           |                           |                           |
|----------------------------------------|---------------------------|---------------------------|---------------------------|---------------------------|---------------------------|---------------------------|---------------------------|---------------------------|---------------------------|---------------------------|
| Medium composition                     | K7                        | K18                       | K34                       | K40                       | K41                       | K45                       | K55                       | K64                       | K112                      | DSM 12361                 |
| MRS 1% FRUCTOSE                        | 0.248±0.015 <sup>Ba</sup> | 0.377±0.018 <sup>Ca</sup> | 0.404±0.016 <sup>Da</sup> | 0.285±0.007 <sup>Ba</sup> | 0.361±0.017 <sup>Ca</sup> | 0.414±0.014 <sup>Da</sup> | 0.378±0.016 <sup>Ca</sup> | 0.258±0.011 <sup>Ba</sup> | 0.193±0.015 <sup>Aa</sup> | 0.408±0.016 <sup>Db</sup> |
| MSR 1% SUCROSE                         | 0.589±0.020 <sup>Dc</sup> | 0.593±0.007 <sup>Dc</sup> | 0.613±0.030 <sup>Dc</sup> | 0.599±0.014 <sup>Dc</sup> | 0.607±0.011 <sup>Dc</sup> | 0.613±0.008 <sup>Dc</sup> | 0.616±0.008 <sup>Dc</sup> | 0.360±0.009 <sup>Bb</sup> | 0.233±0.005 <sup>Ab</sup> | 0.519±0.009 <sup>Cc</sup> |
| MRS WITHOUT SUGAR                      | 0.480±0.018 <sup>Bb</sup> | 0.498±0.020 <sup>Bb</sup> | 0.533±0.027 <sup>Cb</sup> | 0.493±0.005 <sup>Bb</sup> | 0.525±0.020 <sup>Cb</sup> | 0.496±0.007 <sup>Bb</sup> | 0.503±0.010 <sup>Cb</sup> | 0.510±0.021 <sup>Cc</sup> | 0.320±0.016 <sup>Ac</sup> | 0.527±0.011 <sup>Cc</sup> |
| MRS 1% GLUCOSE                         | 0.244±0.010 <sup>Ba</sup> | 0.367±0.011 <sup>Ca</sup> | 0.402±0.025 <sup>Da</sup> | 0.283±0.018 <sup>Ba</sup> | 0.351±0.023 <sup>Ca</sup> | 0.424±0.023 <sup>Da</sup> | 0.369±0.015 <sup>Ca</sup> | 0.256±0.008 <sup>Ba</sup> | 0.203±0.007 <sup>Aa</sup> | 0.188±0.007 <sup>Aa</sup> |
