# Supplementary material for: Antagonistic Activity against Ascosphaera apis and Functional Properties of Lactobacillus kunkeei Strains
Source: MDPI journal article supplement (doi:10.3390/antibiotics9050262), 2020-05-18
Supplement: s1 [file s1]

| Contact time (min) |    | Hydrophobicity (%)       |                          |                          |                          |                          |                          |                          |                          |                          |                          |
|--------------------|----|--------------------------|--------------------------|--------------------------|--------------------------|--------------------------|--------------------------|--------------------------|--------------------------|--------------------------|--------------------------|
|                    |    | K7                       | K18                      | K34                      | K40                      | K41                      | K45                      | K55                      | K64                      | K112                     | DSM 12361                |
| Toluene            | 15 | 27.30±0.51 <sup>Ea</sup> | 16.52±0.51 <sup>Aa</sup> | 20.31±0.35 <sup>Ba</sup> | 70.96±1.81 <sup>Ga</sup> | 65.46±1.41 <sup>Ha</sup> | 21.68±0.44 <sup>Ca</sup> | 73.25±1.85 <sup>Ha</sup> | 29.57±0.31 <sup>Fa</sup> | 25.35±0.41 <sup>Da</sup> | 25.54±0.40 <sup>Da</sup> |
|                    | 30 | 34.00±0.61 <sup>Cb</sup> | 21.81±0.94 <sup>Ab</sup> | 40.80±1.15 <sup>Eb</sup> | 77.10±1.92 <sup>Ib</sup> | 71.20±1.16 <sup>Gb</sup> | 56.44±2.28 <sup>Fb</sup> | 74.11±1.01 <sup>Ha</sup> | 37.10±1.55 <sup>Db</sup> | 36.63±0.70 <sup>Db</sup> | 32.23±1.55 <sup>Bb</sup> |
|                    | 60 | 93.40±1.10 <sup>Fc</sup> | 89.70±1.40 <sup>Ec</sup> | 93.60±1.83 <sup>Fc</sup> | 84.12±0.86 <sup>Cc</sup> | 95.91±0.94 <sup>Gc</sup> | 87.40±1.97 <sup>Dc</sup> | 89.20±0.53 <sup>Eb</sup> | 82.01±1.90 <sup>Bc</sup> | 80.30±1.67 <sup>Ac</sup> | 84.34±0.86 <sup>Cc</sup> |
| Xylene             | 15 | 37.75±2.44 <sup>Ia</sup> | 7.61±0.59 <sup>Ba</sup>  | 24.3±1.46 <sup>Fa</sup>  | 34.09±0.99 <sup>Ha</sup> | 17.69±1.22 <sup>Ea</sup> | 14.08±0.63 <sup>Da</sup> | 30.76±1.51 <sup>Ga</sup> | 10.54±0.62 <sup>Ca</sup> | 4.25±0.27 <sup>Aa</sup>  | 29.34±1.41 <sup>Ga</sup> |
|                    | 30 | 39.61±1.34 <sup>Ea</sup> | 28.56±0.75 <sup>Cb</sup> | 69.99±3.53 <sup>Hb</sup> | 45.54±1.24 <sup>Gb</sup> | 46.98±1.66 <sup>Gb</sup> | 17.16±0.85 <sup>Bb</sup> | 44.99±0.81 <sup>Gb</sup> | 34.16±0.88 <sup>Db</sup> | 5.73±0.37 <sup>Aa</sup>  | 43.44±0.54 <sup>Fb</sup> |
|                    | 60 | 45.89±3.87 <sup>Bb</sup> | 62.34±1.94 <sup>Cc</sup> | 78.17±4.17 <sup>Ec</sup> | 65.64±4.38 <sup>Dc</sup> | 77.37±2.97 <sup>Ec</sup> | 48.53±1.08 <sup>Bc</sup> | 76.64±2.37 <sup>Ec</sup> | 46.81±1.04 <sup>Bc</sup> | 31.91±0.94 <sup>Ab</sup> | 46.77±0.82 <sup>Bc</sup> |
