# Supplementary material for: Antagonistic Activity against Ascosphaera apis and Functional Properties of Lactobacillus kunkeei Strains
Source: MDPI journal article supplement (doi:10.3390/antibiotics9050262), 2020-05-18
Supplement: s1 [file s1]

| Matrices | Inhibition (%)           |                          |                          |                          |                          |                          |                          |                          |                          |                          |
|----------|--------------------------|--------------------------|--------------------------|--------------------------|--------------------------|--------------------------|--------------------------|--------------------------|--------------------------|--------------------------|
|          | K7                       | K18                      | K34                      | K40                      | K41                      | K45                      | K55                      | K64                      | K112                     | DSM 12361                |
| CL       | 100±0.05 <sup>Dc</sup>   | 87.55±2.40 <sup>Bc</sup> | 89.78±1.31 <sup>Bc</sup> | 60.98±2.32 <sup>Ac</sup> | 100±0.05 <sup>Dc</sup>   | 90.31±1.25 <sup>Cc</sup> | 100±0.05 <sup>Dc</sup>   | 89.41±1.14 <sup>Bc</sup> | 89.01±2.01 <sup>Bc</sup> | 87.67±1.91 <sup>Bc</sup> |
| CP       | 66.16±1.12 <sup>Bb</sup> | 76.57±0.51 <sup>Db</sup> | 70.87±2.32 <sup>Cb</sup> | 19.84±0.85 <sup>Ab</sup> | 81.40±0.78 <sup>Fb</sup> | 75.34±1.35 <sup>Db</sup> | 78.29±1.21 <sup>Eb</sup> | 76.77±1.2 <sup>Db</sup>  | 80.57±0.68 <sup>Fb</sup> | 72.50±0.55 <sup>Cb</sup> |
| CFS      | 53.83±0.58 <sup>Ha</sup> | 11.05±0.51 <sup>Ba</sup> | 12.24±2.32 <sup>Ba</sup> | 16.47±0.85 <sup>Ca</sup> | 10.89±0.78 <sup>Ba</sup> | 8.21±1.35 <sup>Aa</sup>  | 21.83±1.31 <sup>Fa</sup> | 19.02±1.21 <sup>Ea</sup> | 17.73±0.68 <sup>Da</sup> | 24.32±0.55 <sup>Ga</sup> |
| BC       | 100 ±0.05 <sup>Ac</sup>  | 100 ±0.05 <sup>Ad</sup>  | 100 ±0.05 <sup>Ad</sup>  | 100 ±0.05 <sup>Ad</sup>  | 100 ±0.05 <sup>Ac</sup>  | 100 ±0.05 <sup>Ad</sup>  | 100 ±0.05 <sup>Ac</sup>  | 100 ±0.05 <sup>Ad</sup>  | 100 ±0.05 <sup>Ad</sup>  | 100 ±0.05 <sup>Ad</sup>  |
